# Supplementary material
Source: publisher figshare collection journal article supplement (https://sage.figshare.com/ndownloader/files/15254630)

**Supplementary Figure 1.** Immunofluorescence detection for (A) cTnT, (B) connexin-43, (C) desmin, and (D)  $\alpha$ -actin in in cardiomyocytes (CMC) while co-cultured with GATA-4 overexpressed BMSCs. Blue: the nuclei were stained with DAPI. Red: Dil labeled BMSCs. Green: labeled cTnT, connexin-43, desmin, or  $\alpha$ -actin. Orange or Yellow: Red and Green overlapping. Before co-cultured, the BMSCs were labeled with Dil, but single cultured BMSCs were not labeled with Dil.

Supplementary Figure 1.

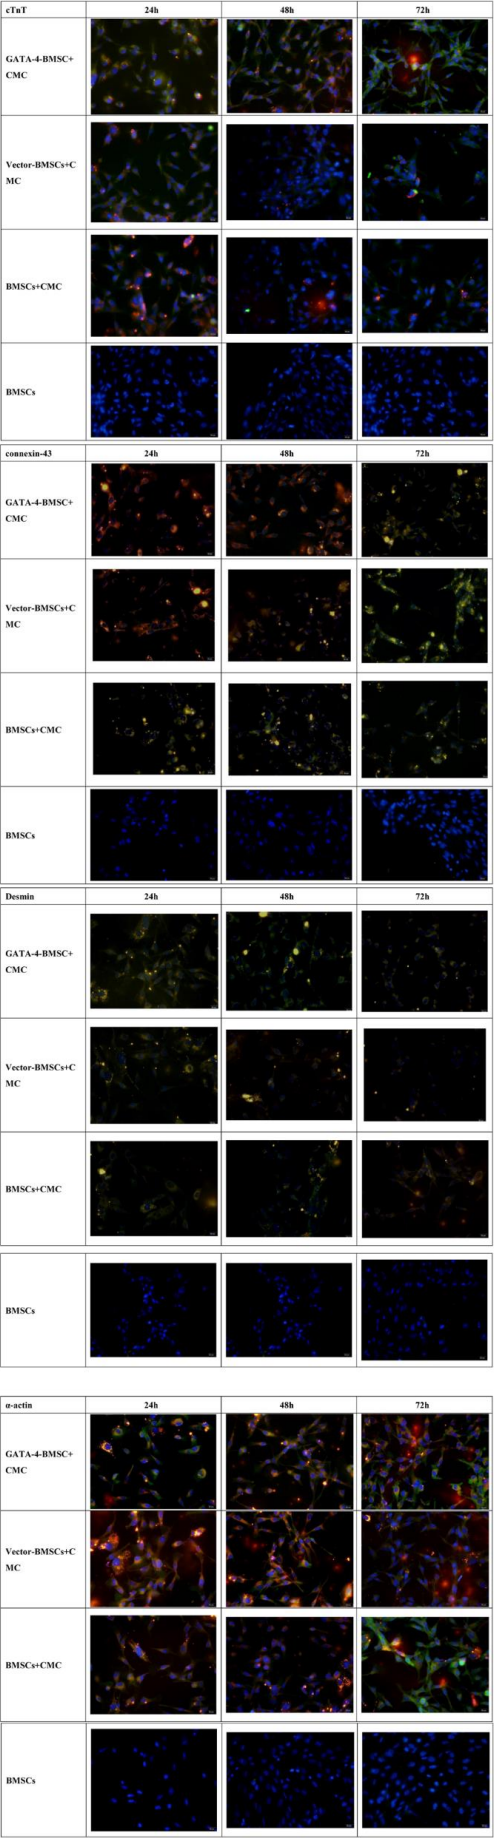

**Supplementary Figure 2.** Comparisons between groups in mRNA expression of myocardial infarction markers: (A) cTnT, (B) connexin-43, (C) desmin, and (D)  $\alpha$ -actin. \*  $p<0.05$ , represented significantly different with BMSC group; †  $p<0.05$ , represented significantly different with BMSC+CMC group; ‡  $p<0.05$ , represented significantly different with NC-BMSC+CMC group

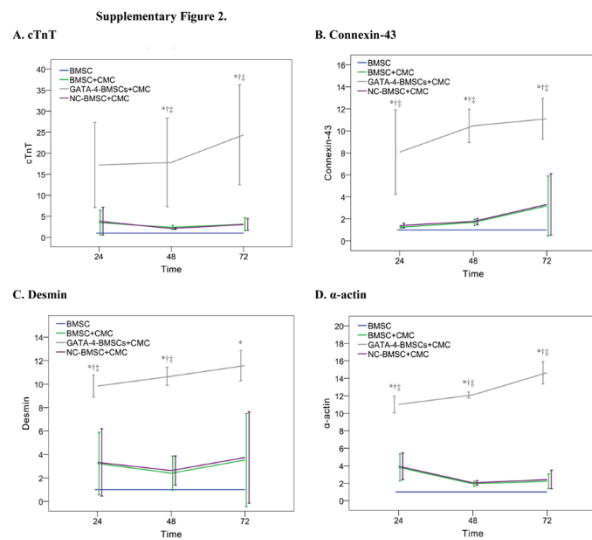

**Supplementary Figure 3.** Evaluation of heart region fluorescence intensity of BMSC after transplanted BMSC in the myocardial infarction (MI) mouse model. (A) After transplanted BMSC (A) 48 hr, (B) 72hr, and (C) 96 hr. From left to right is BMSC MI, NC-BMSC MI, GATA-4-BMSC MI, control (without transplanted BMSC) MI, normal mice without feed doxycycline, normal mice feed doxycycline.

(A).

```

User:          Terence
Group:         PhD-S1
Experiment:    63-60 50 71 c d-4h
Comment1:     All Stage
Comment2:

```

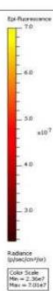

```

User:      Terence
Group:     PhD-St
Experiment: 72 70 65 74 xl xl xl
Comment1:  All Stage
Comment2:

```

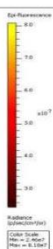

```

User:      Terrence
Group:     PKG-S3
Experiment: 6 25 36 2 5 P-K2H
Comment1:  All Stage
Comment2:

```

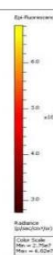

Supplement: Supplementary file 1 [file 15254630]
